# Supplementary material for: Application of Computational Methods for the Design of BACE-1 Inhibitors: Validation of in Silico Modelling
Source: PubMed Central journal article supplement (PMC3975444; doi:10.3390/ijms15035128), 2014-03-24
Supplement: ijms-15-05128-s001.pdf [file ijms-15-05128-s001.pdf]

**Table S2.** Water molecules, present in the active site of  $\beta$ -secretase. The active center was defined as the space within 8 Å from the ligand. The numbers of waters correspond to the number from Protein Data Bank (PDB) files. Water molecules written in **bold** interact with ligand and were taken into account during validation of docking. The numbers highlighted in red indicate water molecules that interact with catalytic aspartates.

| 1FKN       | 1M4H       | 1TQF       | 2B8L       | 2F3F       | 2IQG       | 2OAH       | 2OHQ       | 2QP8       | 2QU3       | 2QZL       | 2VNM | 2VNN        | 2ZJM | 3CIC | 3L5E       | 3OHH       | 4ACX        | 4B1D        | 4D8C       |
|------------|------------|------------|------------|------------|------------|------------|------------|------------|------------|------------|------|-------------|------|------|------------|------------|-------------|-------------|------------|
| <b>9</b>   | <b>15</b>  | 404        | 393        | 607        | 903        | 906        | 408        | 918        | 464        | 451        | 2008 | 2008        | 450  | 602  | 517        | 416        | 2012        | 2003        | 603        |
| <b>10</b>  | <b>52</b>  | <b>405</b> | 394        | 608        | 908        | 913        | 409        | 919        | 466        | 452        | 2009 | 2009        | 458  | 631  | 840        | 421        | 2013        | 2007        | 605        |
| <b>11</b>  | <b>85</b>  | 425        | 399        | 609        | 909        | 916        | 411        | 920        | 471        | 454        | 2011 | 2011        | 461  | 673  | 841        | 425        | 2015        | 2008        | 608        |
| <b>12</b>  | <b>189</b> | 431        | 406        | 614        | 912        | 918        | 412        | <b>921</b> | 474        | 459        | 2012 | 2012        | 462  | 676  | 842        | 434        | 2027        | 2011        | <b>617</b> |
| <b>13</b>  | 213        | 433        | 421        | 623        | 925        | 924        | 441        | 922        | 483        | 475        | 2031 | 2032        | 463  | 689  | 843        | 439        | 2032        | 2012        | 624        |
| 388        | <b>224</b> | <b>436</b> | 424        | 652        | <b>928</b> | 942        | 444        | 923        | 486        | 483        | 2033 | 2033        | 478  | 705  | <b>844</b> | 452        | <b>2033</b> | <b>2013</b> | 625        |
| 391        | <b>225</b> | 438        | <b>429</b> | 658        | 929        | 943        | 468        | 924        | <b>487</b> | 486        | 2050 | <b>2034</b> | 486  | 720  | 845        | 462        | 2035        | 2014        | 626        |
| 401        | 387        | 449        | 430        | <b>666</b> | 931        | <b>944</b> | 514        | 925        | 490        | <b>489</b> | 2051 | 2051        | 502  | 731  | 848        | <b>476</b> | 2036        | 2015        | 627        |
| 414        | 390        | 450        | 433        | 685        | 943        | 947        | 567        | 926        | 491        | 497        | 2052 | 2072        | 529  | 746  | 849        | 480        | 2037        | 2029        | 630        |
| 430        | 393        | 451        | 436        | 695        | 966        | 969        | 575        | 927        | 504        | 501        | 2083 | 2085        | 583  | 768  | 850        | 481        | 2038        | <b>2030</b> | 632        |
| 442        | <b>398</b> | 458        | 441        | 697        | 968        | 972        | <b>582</b> | 928        | 509        | 502        | 2086 | 2088        | 611  | 770  | 852        | 497        | 2039        | 2031        | <b>647</b> |
| 446        | 399        | 459        | 448        | 698        | 983        | 966        | 593        | 929        | 515        | 504        | 2087 | 2089        | 613  | 772  | 853        | <b>502</b> | 2044        | 2032        | 648        |
| 451        | 409        | 460        | 458        | 700        | 1000       | 988        | 595        | 930        | 533        | 506        | 2088 | 2090        | 614  | 775  | <b>854</b> | 533        | <b>2080</b> | 2033        | 649        |
| 462        | <b>419</b> | 482        | 470        | 710        | 1002       | 1017       | 605        | 931        | 554        | 526        | 2089 | 2091        | 618  | 834  | <b>855</b> | 538        | <b>2082</b> | 2036        | 653        |
| 473        | 424        | <b>489</b> | <b>474</b> | 716        | 1004       | 1018       | 621        | 932        | 571        | 528        | 2091 | 2094        | 624  | 856  | 856        | 577        | 2104        | 2042        | 660        |
| 482        | 439        | 492        | 476        | 718        | 1009       | 1026       | -          | 933        | 574        | 534        | 2092 | 2095        | 625  | 881  | 858        | <b>578</b> | 2105        | 2064        | 666        |
| 487        | 440        | 495        | 483        | 726        | 1017       | 1033       | -          | 934        | -          | 535        | 2093 | 2096        | 635  | 939  | 859        | 592        | 2108        | 2066        | 676        |
| <b>490</b> | 446        | 496        | 504        | 734        | 1026       | 1038       | -          | 935        | -          | 544        | 2094 | 2097        | 639  | 978  | 860        | <b>594</b> | 2150        | 2068        | 679        |
| 502        | 456        | 509        | <b>519</b> | 742        | 1052       | 1058       | -          | 936        | -          | 551        | 2125 | 2134        | 644  | 990  | 861        | <b>595</b> | <b>2169</b> | 2072        | 686        |
| 507        | 457        | 510        | 521        | 768        | 1066       | 1080       | -          | 937        | -          | 555        | 2129 | 2136        | 645  | 1016 | 862        | 596        | 2170        | 2095        | 697        |

Table S2. Cont.

| 1FKN | 1M4H | 1TQF       | 2B8L | 2F3F | 2IQG | 2OAH        | 2OHQ | 2QP8 | 2QU3 | 2QZL       | 2VNM        | 2VNN        | 2ZJM | 3CIC | 3L5E | 3OHH       | 4ACX        | 4B1D        | 4D8C       |
|------|------|------------|------|------|------|-------------|------|------|------|------------|-------------|-------------|------|------|------|------------|-------------|-------------|------------|
| 514  | 468  | 525        | 538  | -    | 1072 | 1085        | -    | 938  | -    | <b>565</b> | 2133        | 2140        | 648  | -    | 863  | 603        | <b>2171</b> | 2097        | 698        |
| 520  | 497  | 529        | 539  | -    | 1085 | 1101        | -    | 939  | -    | 581        | 2204        | 2144        | 662  | -    | 864  | 607        | 2172        | 2098        | 705        |
| 537  | 509  | <b>537</b> | 545  | -    | 1094 | 1122        | -    | 941  | -    | 588        | 2229        | 2145        | 668  | -    | 865  | 622        | 2173        | 2146        | <b>719</b> |
| 540  | 512  | 543        | 557  | -    | 1097 | 1134        | -    | 942  | -    | 595        | 2230        | 2158        | 674  | -    | 867  | <b>633</b> | 2174        | 2147        | 720        |
| 560  | 530  | 548        | 561  | -    | 1108 | 1140        | -    | 943  | -    | 596        | <b>2231</b> | <b>2162</b> | 686  | -    | 869  | 640        | 2178        | <b>2171</b> | 732        |
| 589  | 534  | 558        | 576  | -    | 1110 | 1146        | -    | 944  | -    | <b>604</b> | 2232        | 2221        | 688  | -    | 870  | 641        | 2179        | 2172        | <b>733</b> |
| 599  | 554  | 559        | 580  | -    | 1121 | <b>1155</b> | -    | 946  | -    | <b>608</b> | <b>2233</b> | 2246        | 705  | -    | 871  | 653        | 2247        | 2173        | 749        |
| 560  | 570  | 562        | 585  | -    | 1122 | 1162        | -    | 947  | -    | 623        | 2326        | 2247        | -    | -    | 872  | 670        | -           | 2177        | 750        |
| 636  | 575  | 566        | -    | -    | 1123 | 1164        | -    | 948  | -    | <b>625</b> | <b>2327</b> | 2248        | -    | -    | 873  | 674        | -           | 2252        | 768        |
| 641  | 586  | 569        | -    | -    | 1124 | 1165        | -    | 950  | -    | 631        | 2329        | 2249        | -    | -    | 874  | 681        | -           | -           | 769        |
| 643  | 593  | 584        | -    | -    | 1163 | 1173        | -    | 951  | -    | 637        | 2333        | 2250        | -    | -    | 875  | <b>683</b> | -           | -           | 788        |
| 645  | -    | 599        | -    | -    | 1165 | 1182        | -    | 952  | -    | 656        | 2334        | 2251        | -    | -    | 876  | 684        | -           | -           | 798        |

**Table S3.** Results of cross-dockings to ten crystal structures of  $\beta$ -secretase (BACE-1): Assessment with RMSD values. Asterisks indicate complexes which required water molecules for better results of docking.

| Ligand | Protein |      |      |        |      |      |        |        |      |      |
|--------|---------|------|------|--------|------|------|--------|--------|------|------|
|        | 2B8L    | 2F3F | 2OHQ | 2VNM * | 2VNN | 2ZJM | 3L5E * | 4ACX * | 4B1D | 4D8C |
| 2B8L   | 0.65    | 3.74 | 2.56 | 2.93   | 4.78 | 3.13 | 3.28   | 3.41   | 2.91 | 1.44 |
| 2F3F   | 0.85    | 0.63 | 1.53 | 0.91   | 0.72 | 0.98 | 0.83   | 1.38   | 0.93 | 0.90 |
| 2IQG   | 4.16    | 2.85 | 3.95 | 4.19   | 3.89 | 3.78 | 2.50   | 4.43   | 3.77 | 4.36 |
| 2OAH   | 1.16    | 4.39 | 1.81 | 2.36   | 3.01 | 4.30 | 1.79   | 4.19   | 2.68 | 2.31 |
| 2OHQ   | 2.69    | 1.84 | 0.24 | 2.66   | 1.41 | 2.13 | 0.57   | 1.79   | 3.03 | 2.06 |
| 2QP8   | 2.61    | 4.74 | 4.24 | 3.64   | 3.58 | 4.03 | 2.07   | 4.06   | 4.40 | 2.55 |
| 2QU3   | 2.96    | 2.06 | 2.73 | 2.63   | 2.32 | 2.91 | 1.88   | 1.17   | 1.15 | 2.38 |
| 2QZL   | 4.93    | 4.02 | 4.76 | 4.40   | 4.09 | 3.92 | 4.82   | 3.59   | 3.25 | 1.98 |
| 2VNM   | 3.48    | 4.66 | 3.03 | 1.48   | 1.92 | 2.12 | 3.87   | 3.34   | 4.44 | 1.72 |
| 2VNN   | 1.82    | 4.10 | 3.08 | 0.76   | 2.18 | 2.13 | 1.38   | 3.05   | 2.82 | 0.92 |
| 2ZJM   | 2.67    | 2.69 | 2.78 | 2.85   | 3.28 | 0.55 | 2.59   | 3.18   | 3.04 | 1.83 |
| 3CIC   | 4.18    | 3.96 | 4.20 | 3.43   | 4.38 | 3.38 | 2.42   | 2.86   | 4.44 | 3.83 |
| 3L5E   | 3.88    | 2.59 | 3.52 | 4.15   | 4.94 | 3.10 | 0.89   | 2.83   | 5.53 | 5.84 |
| 3OHH   | 3.67    | 3.92 | 4.28 | 4.66   | 2.52 | 4.02 | 2.85   | 4.80   | 2.86 | 4.58 |
| 4ACX   | 2.05    | 2.42 | 0.90 | 3.35   | 3.43 | 3.35 | 1.69   | 0.48   | 0.72 | 1.62 |
| 4B1D   | 3.03    | 2.72 | 3.56 | 3.72   | 3.38 | 2.19 | 2.69   | 1.40   | 0.27 | 2.58 |
| 4D8C   | 2.66    | 3.68 | 3.60 | 3.16   | 3.51 | 3.42 | 2.92   | 3.56   | 3.25 | 1.34 |

**Table S4.** The library of compounds, containing sixty inhibitors, which was used to examine scoring–activity relationship (S, training set; T, test set; and \*, numbers of compounds in the original papers).

| Entry No. | Set | Publication                            | No. (ref.) * | IC <sub>50</sub> exp. [μM] | pIC <sub>50</sub> exp. | GoldScore |
|-----------|-----|----------------------------------------|--------------|----------------------------|------------------------|-----------|
| 1         | S   |                                        | <b>2</b>     | 2000                       | 2.70                   | 44.7      |
| 2         | S   |                                        | <b>8a</b>    | 0.69                       | 6.16                   | 64.57     |
| 3         | T   |                                        | <b>8b</b>    | 5                          | 5.30                   | 65.78     |
| 4         | T   |                                        | <b>7</b>     | 9                          | 5.05                   | 59.32     |
| 5         | S   | Congreve <i>et al.</i>                 | <b>6c</b>    | 24                         | 4.62                   | 62.79     |
| 6         | S   | <i>J. Med. Chem.</i> <b>2007</b> ,     | <b>4</b>     | 25                         | 4.60                   | 58.87     |
| 7         | S   | 50, 1124–1132 [40]                     | <b>6b</b>    | 40                         | 4.40                   | 57.29     |
| 8         | T   |                                        | <b>3</b>     | 94                         | 4.03                   | 53.7      |
| 9         | S   |                                        | <b>6a</b>    | 100                        | 4.00                   | 55.13     |
| 10        | T   |                                        | <b>5</b>     | 310                        | 3.51                   | 47.96     |
| 11        | T   |                                        | <b>1</b>     | 2000                       | 2.70                   | 40.1      |
| 12        | T   |                                        | <b>3</b>     | 0.1                        | 7.00                   | 74.07     |
| 13        | S   |                                        | <b>8</b>     | 0.11                       | 6.96                   | 73.92     |
| 14        | S   |                                        | <b>4</b>     | 0.12                       | 6.92                   | 74.54     |
| 15        | S   | Piazzini <i>et al.</i>                 | <b>5</b>     | 0.13                       | 6.89                   | 79.4      |
| 16        | T   | <i>Bioorg. Med. Chem</i>               | <b>2</b>     | 0.15                       | 6.82                   | 72.49     |
| 17        | T   | <i>Lett.</i> <b>2008</b> , 18, 423–426 | <b>1</b>     | 0.24                       | 6.62                   | 67.61     |
| 18        | T   | [41]                                   | <b>7</b>     | 0.12                       | 6.92                   | 72.2      |
| 19        | S   |                                        | <b>6</b>     | 0.15                       | 6.82                   | 73.76     |
| 20        | T   |                                        | <b>9</b>     | 0.151                      | 6.82                   | 70.94     |
| 21        | T   | Shimmyo <i>et al.</i>                  | <b>Myr</b>   | 2.8                        | 5.55                   | 54.23     |
| 22        | S   | <i>Biochim. Biophys. Acta</i>          | <b>Que</b>   | 5.4                        | 5.27                   | 51.45     |
| 23        | S   | <b>2008</b> , 1780, 819–825            | <b>Kae</b>   | 14.7                       | 4.83                   | 49.91     |
| 24        | S   | [42]                                   | <b>Mor</b>   | 21.7                       | 4.66                   | 51.34     |
| 25        | T   |                                        | <b>Api</b>   | 38.5                       | 4.41                   | 50.96     |

Table S4. Cont.

| Entry No. | Set | Publication              | No. (ref.) * | IC <sub>50</sub> exp. [μM] | pIC <sub>50</sub> exp. | GoldScore |
|-----------|-----|--------------------------|--------------|----------------------------|------------------------|-----------|
| 26        | T   |                          | 13           | 100                        | 4.00                   | 45.37     |
| 27        | S   |                          | 4            | 100                        | 4.00                   | 43        |
| 28        | T   |                          | 5            | 100                        | 4.00                   | 43.96     |
| 29        | S   |                          | 3            | 100                        | 4.00                   | 46.3      |
| 30        | T   | Jung <i>et al.</i>       | 10           | 18.58                      | 4.73                   | 48.9      |
| 31        | T   | <i>Arch. Pharm. Res.</i> | 11           | 23.4                       | 4.63                   | 46.12     |
| 32        | T   | 2009, 32, 1399–1408      | 9            | 24.1                       | 4.62                   | 50.47     |
| 33        | T   | [43]                     | 2            | 41.32                      | 4.38                   | 43.23     |
| 34        | S   |                          | 12           | 46.09                      | 4.34                   | 46.15     |
| 35        | T   |                          | 1            | 61.21                      | 4.21                   | 46.15     |
| 36        | S   |                          | 8            | 92.2                       | 4.04                   | 42.99     |
| 37        | S   |                          | 2g           | 10                         | 5.00                   | 59.46     |
| 38        | T   |                          | 2f           | 10                         | 5.00                   | 66.03     |
| 39        | S   |                          | 2d           | 10                         | 5.00                   | 54.42     |
| 40        | T   | Asso <i>et al.</i>       | 2c           | 10                         | 5.00                   | 61.99     |
| 41        | S   | <i>ChemMedChem</i> 2008, | 2b           | 0.5                        | 6.30                   | 67.59     |
| 42        | T   | 3, 1530–1534 [44]        | 1            | 1.1                        | 5.96                   | 70.1      |
| 43        | T   |                          | 2e           | 1.66                       | 5.78                   | 64.45     |
| 44        | S   |                          | 2a           | 2.99                       | 5.52                   | 62.03     |

Table S4. Cont.

| Entry No. | Set | Publication                    | No. (ref.) * | IC <sub>50</sub> exp. [μM] | pIC <sub>50</sub> exp. | GoldScore |
|-----------|-----|--------------------------------|--------------|----------------------------|------------------------|-----------|
| 45        | S   |                                | <b>5c</b>    | 0.056                      | 7.25                   | 80.65     |
| 46        | T   |                                | <b>5b</b>    | 0.063                      | 7.20                   | 76.74     |
| 47        | S   |                                | <b>6c</b>    | 0.089                      | 7.05                   | 78.53     |
| 48        | T   |                                | <b>6b</b>    | 0.112                      | 6.95                   | 74.15     |
| 49        | S   |                                | <b>4b</b>    | 0.158                      | 6.80                   | 84.94     |
| 50        | S   |                                | <b>5e</b>    | 0.262                      | 6.58                   | 71.62     |
| 51        | T   | Chirapu <i>et al.</i>          | <b>1</b>     | 0.281                      | 6.55                   | 76.82     |
| 52        | T   | Bioorg. Med. Chem.             | <b>5a</b>    | 0.524                      | 6.28                   | 72.7      |
| 53        | T   | <i>Lett.</i> <b>2009</b> , 19, | <b>5d</b>    | 0.740                      | 6.13                   | 77.07     |
| 54        | S   | 264–274 [45]                   | <b>3b</b>    | 0.811                      | 6.09                   | 80.57     |
| 55        | T   |                                | <b>2c</b>    | 0.889                      | 6.05                   | 78.03     |
| 56        | S   |                                | <b>6a</b>    | 0.998                      | 6.00                   | 75.15     |
| 57        | S   |                                | <b>3c</b>    | 1.119                      | 5.95                   | 77.71     |
| 58        | T   |                                | <b>3d</b>    | 1.256                      | 5.90                   | 78.88     |
| 59        | S   |                                | <b>2a</b>    | 1.581                      | 5.80                   | 76.79     |
| 60        | S   |                                | <b>2b</b>    | 2.506                      | 5.60                   | 74.09     |

exp. means experimental.
